# Supplementary material for: Drug-nutrient cocrystallization-driven strategy towards self-assembly of milrinone and ferulic acid provides an exemplification in perfecting in vitro/vivo characteristics of anti-heart failure drugs
Source: Royal Society of Chemistry journal article supplement (doi:10.1039/d2nj01509a), 2022-01-01
Supplement: d2nj01509a1.pdf [file d2nj01509a1.pdf]

## Supplementary Information

### **Drug-nutrient cocrystallization-driven strategy towards self-assembly of milrinone and ferulic acid provides an exemplification in perfecting *in vitro/vivo* characteristics of anti-heart failure drugs**

Lu Liu<sup>a,+</sup>, Yue-Ming Yu,<sup>a,b,+</sup> Yu Yu,<sup>c</sup> Fan-Zhi Bu,<sup>a</sup> Zhi-Yong Wu,<sup>a,b</sup> Cui-Wei Yan,<sup>a,\*</sup> Yan-Tuan Li,<sup>a,b,\*</sup>

<sup>a</sup>*School of Medicine and Pharmacy and College of Marine Life Science, Ocean University of China, Qingdao, Shandong 266003, PR China.*

<sup>b</sup>*Laboratory for Marine Drugs and Bioproducts, Qingdao National Laboratory for Marine Science and Technology, 266003, PR China.*

<sup>c</sup>*Qingdao Institute for Food and Drug Control, Qingdao, Shandong 266071, PR China.*

\*Corresponding authors

+These authors contributed equally to this work

E-mail addresses: [wzy\\_ouc@163.com](mailto:wzy_ouc@163.com) (Zhi-Yong Wu), [cuiweiyang@ouc.edu.cn](mailto:cuiweiyang@ouc.edu.cn) (Cui-Wei Yan),

[yantuanli@ouc.edu.cn](mailto:yantuanli@ouc.edu.cn) (Yan-Tuan Li).

## Contents

**Fig. S1** FT-IR spectra of MLN-FEA cocrystal, FEA and MLN.

**Fig. S2** PXRD comparison of simulated pattern and experimental pattern for remaining solids after the powder dissolution measurements.

**Fig. S3** IDR profiles of MLN and MLN-FEA cocrystal at pH 1.2, 4.0, and 6.8 buffers.

**Table S1** Some parameters related to molecular electrostatic potentials.

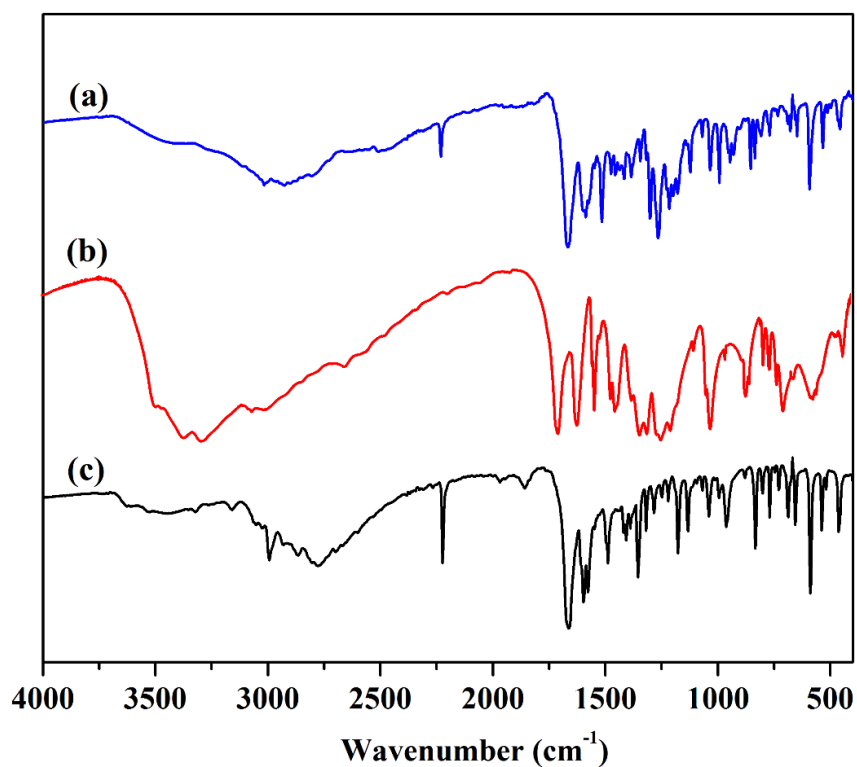

**Fig. S1** FT-IR spectra of MLN-FEA cocrystal (a), FEA (b) and MLN (c).

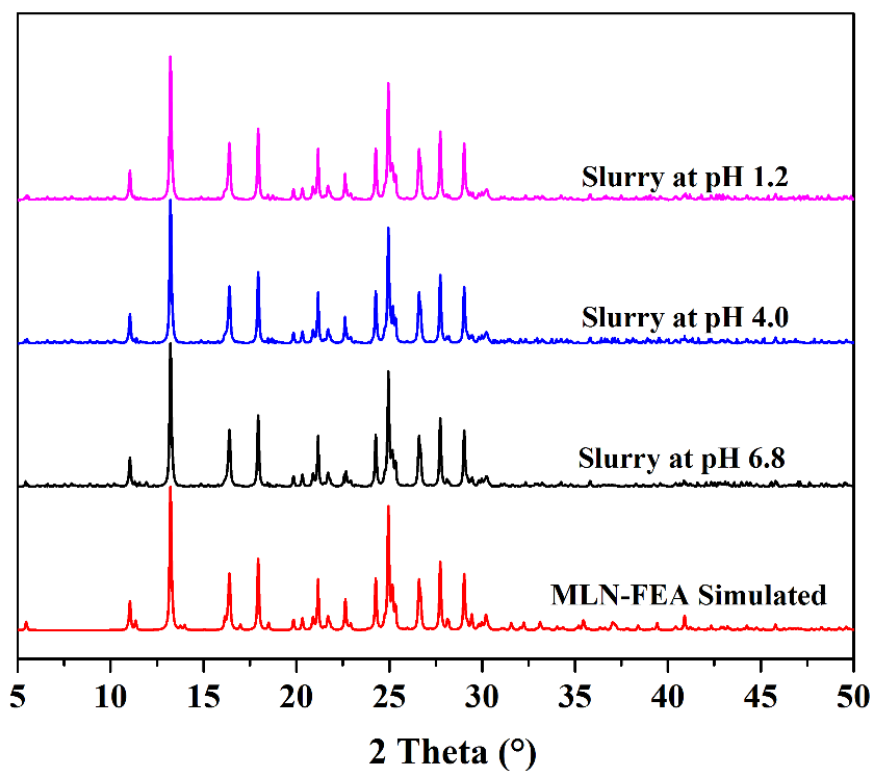

**Fig. S2** PXRD comparison of simulated pattern and experimental pattern for remaining solids after the powder dissolution measurements.

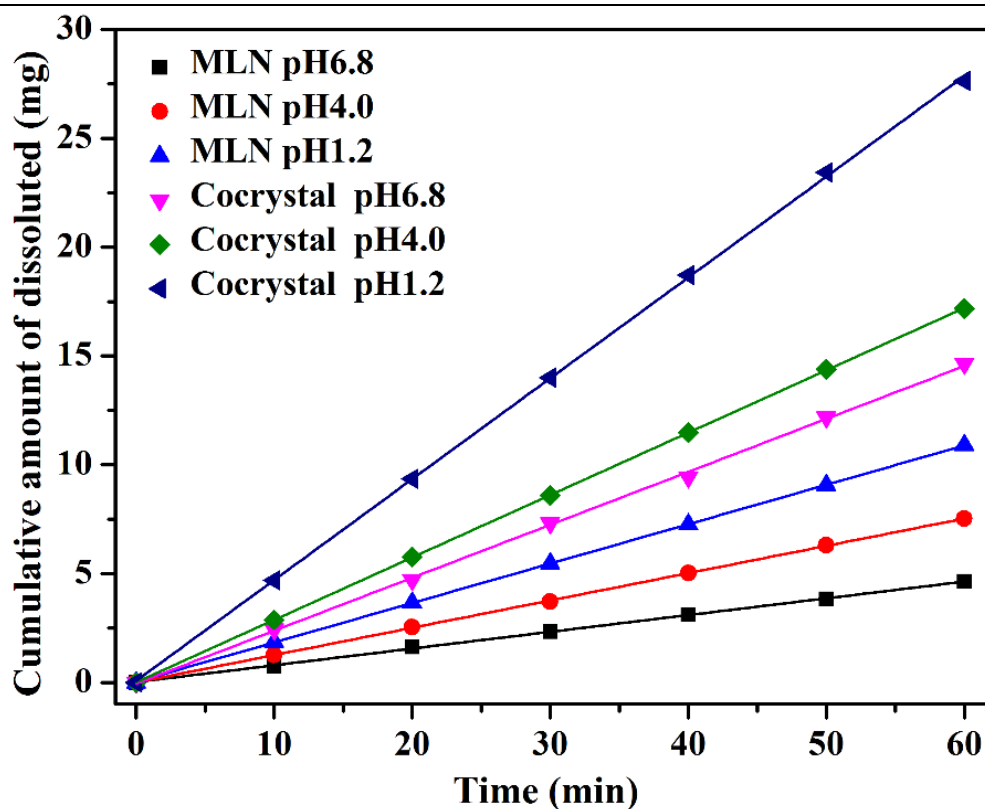

Fig. S3. IDR profiles of MLN and MLN-Fea cocrystal at pH 1.2, 4.0, and 6.8 buffers.

Table S1 Some parameters related to molecular electrostatic potentials.

| Samples   | Global average positive electrostatic potential (kJ/mol) | Global average negative electrostatic potential (kJ/mol) | Molecular polarity index (kJ/mol) | Polar surface area percentage (%) |
|-----------|----------------------------------------------------------|----------------------------------------------------------|-----------------------------------|-----------------------------------|
| MLN       | 60.85                                                    | -75.06                                                   | 65.23                             | 70.99%                            |
| Cocrystal | 70.60                                                    | -80.29                                                   | 75.34                             | 73.68%                            |
